# Supplementary material for: Direct Transport to Cardiac Arrest Center and Survival Outcomes after Out-of-Hospital Cardiac Arrest by Urbanization Level
Source: MDPI journal article supplement (doi:10.3390/jcm11041033), 2022-02-16
Supplement: s1 [file s1]

## Supplementary

**Table S1.** Sensitivity analysis of multivariable logistic regression model for pulseless out-of-hospital cardiac arrest patients who did not achieve prehospital ROSC.

|                            | Total Outcome |          |     | Model 1          | Model 2          | Model 3          |
|----------------------------|---------------|----------|-----|------------------|------------------|------------------|
|                            | <i>n</i>      | <i>n</i> | %   | aOR (95% CI)     | aOR (95% CI)     | aOR (95% CI)     |
| Good neurological recovery |               |          |     |                  |                  |                  |
| Transported hospital       |               |          |     |                  |                  |                  |
| Non-cardiac center         | 65,299        | 242      | 0.4 | 1.00             | 1.00             | 1.00             |
| Cardiac center             | 19,312        | 139      | 0.7 | 1.46 (1.17–1.82) | 1.37 (1.09–1.72) | 1.49 (1.18–1.87) |
| Urbanization level         |               |          |     |                  |                  |                  |
| Urban/rural area           | 50,825        | 147      | 0.3 | 1.00             | 1.00             | 1.00             |
| Metropolitan area          | 33,786        | 234      | 0.7 | 1.12 (1.71–2.64) | 2.07 (1.66–2.58) | 1.91 (1.52–2.40) |
| Survival to discharge      |               |          |     |                  |                  |                  |
| Transported hospital       |               |          |     |                  |                  |                  |
| Non-cardiac center         | 65,299        | 1,181    | 1.8 | 1.00             | 1.00             | 1.00             |
| Cardiac center             | 19,312        | 606      | 3.1 | 1.45 (1.31–1.61) | 1.36 (1.23–1.52) | 1.45 (1.30–1.61) |
| Urbanization level         |               |          |     |                  |                  |                  |
| Urban/rural area           | 50,825        | 810      | 1.6 | 1.00             | 1.00             | 1.00             |
| Metropolitan area          | 33,786        | 977      | 2.9 | 1.64 (1.48–1.81) | 1.59 (1.43–1.75) | 1.46 (1.32–1.62) |

aOR, adjusted odds ratio; CI, confidence interval. Model 1: adjusted for age and sex. Model 2: adjusted for variables in Model 1, comorbidities (diabetes mellitus, hypertension, and heart disease), place of arrest, witness status, bystander CPR, and initial shockable rhythm. Model 3: adjusted for variables in Model 2, response time interval, scene time interval, transport time interval, multi-tier response, EMS airway management, and mechanical CPR.
